# Supplementary material for: Predictors of Acute Kidney Injury (AKI) among COVID-19 Patients at the US Department of Veterans Affairs: The Important Role of COVID-19 Vaccinations
Source: MDPI journal article supplement (doi:10.3390/vaccines12020146), 2024-01-30
Supplement: s1 [file s1]

### Supplement

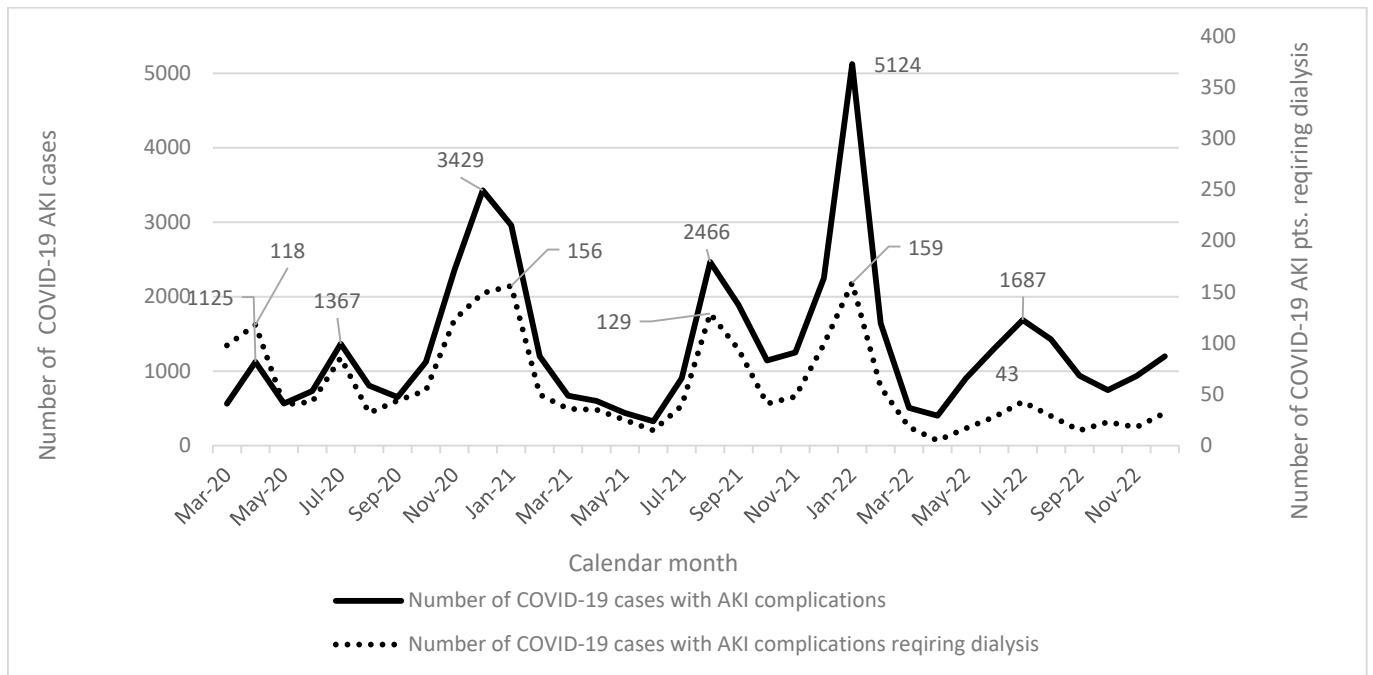

**Figure S1. Monthly numbers of new COVID-19 cases that developed AKI within 60 days of COVID-19 diagnosis among VA patients between January 2020 and December 2022**

Table S1. Additional Clinical and demographic characteristics of COVID-19 patients at the US Department of Veterans Affairs between January 2020 and December 2022 by AKI and hospitalization status.

| Characteristics                                                     | AKI No. (%) | no AKI No. (%) | p-value | AKI No. (%)                  | no AKI No. (%) | p-value |
|---------------------------------------------------------------------|-------------|----------------|---------|------------------------------|----------------|---------|
| <b>All patients</b>                                                 |             |                |         | <b>Hospitalized patients</b> |                |         |
| Number of patients                                                  | 45,754      | 697,045        |         | 28,573                       | 67,000         |         |
| 30-day Mortality                                                    | 8,234 (18)  | 11,760 (2%)    | <.0001  | 5,160 (18)                   | 3,080 (5)      | <.0001  |
| 60-day mortality                                                    | 10,338(23)  | 15,330 (2)     | <.0001  | 6,686 (23)                   | 4,390 (7)      | <.0001  |
| <b>Comorbidities in the past 2 years period COVID1-19 diagnosis</b> |             |                |         |                              |                |         |
| Nephrosis                                                           | 3,342 (7)   | 11,003 (1)     | <.0001  | 2185 (8)                     | 2,055 (3)      | <.0001  |
| Any kidney disease                                                  | 22,160 (48) | 113,011 (16)   | <.0001  | 14,371 (50)                  | 20,595 (31)    | <.0001  |
| Urinary Stones                                                      | 7,692 (17)  | 51,790 (7)     | <.0001  | 5,039 (18)                   | 8,569 (13)     | <.0001  |
| Cardiomyopathy                                                      | 3,841 (8)   | 16,594 (2)     | <.0001  | 2,661 (9)                    | 3,880 (6)      | <.0001  |
| Arrhythmia                                                          | 2,732 (6)   | 19,831 (3)     | <.0001  | 1,972 (7)                    | 3,957 (6)      | <.0001  |
| Acute Cardiac Injury (ACI)/Acute MI                                 | 2,892 (6)   | 12,031 (2)     | <.0001  | 1,997 (7)                    | 3,108 (5)      | <.0001  |
| Coronary Atherosclerotic Disease (CAHD)                             | 16,028 (35) | 108,370 (16)   | <.0001  | 10,397 (36)                  | 19,215 (29)    | <.0001  |
| Peripheral Arterial Disease (PAD)                                   | 10,134 (22) | 52,933 (8)     | <.0001  | 6,856 (24)                   | 11,565 (17)    | <.0001  |
| Venous Thromboembolism (VTE)                                        | 2,347 (5)   | 14,102 (2)     | <.0001  | 1,633 (6)                    | 3,200 (5)      | <.0001  |
| Cerebrovascular Disease                                             | 19,23 (4)   | 10,897 (2)     | <.0001  | 1,377 (5)                    | 2,731 (4)      | <.0001  |
| Pneumonia                                                           | 5,834(13)   | 29,580 (4)     | <.0001  | 3,961 (14)                   | 7,691 (11)     | <.0001  |
| Bronchitis                                                          | 3,236 (7)   | 32,515 (5)     | <.0001  | 2,179 (8)                    | 5,112 (8)      | 0.3     |
| Lower Respiratory Tract Infection                                   | 3,620 (8)   | 45,048 (7)     | <.0001  | 2,378 (8)                    | 5,553 (8)      | 0.9     |
| Any Respiratory Disease                                             | 23,108 (51) | 226,531 (33)   | <.0001  | 14,915 (52)                  | 32,947 (49)    | <.0001  |
| Obstructive Sleep Apnea (OSA)                                       | 14,954 (33) | 200,262 (29)   | <.0001  | 9,148 (32)                   | 21174 (32)     | 0.2     |
| Hyperlipidemia                                                      | 32,247 (70) | 355,017 (51)   | <.0001  | 20,022 (70)                  | 42,670 (64)    | <.0001  |
| Liver Disease                                                       | 4,481 (10)  | 41,736 (6)     | <.0001  | 3,078 (11)                   | 6,757 (10)     | 0.001   |
| Septic Shock                                                        | 34,92 (8)   | 12,909 (2)     | <.0001  | 2,422 (8)                    | 4,100 (6)      | <.0001  |
| Cancer                                                              | 10,842 (24) | 79,332 (11)    | <.0001  | 7,218 (25)                   | 14,287 (21)    | <.0001  |
| PTSD                                                                | 9,468 (21)  | 163,318 (23)   | <.0001  | 5,727 (20)                   | 17,215 (26)    | <.0001  |
| Major Depressive Disorder (MDD)                                     | 14,435 (32) | 216,262 (31)   | 0.1     | 9,060 (32)                   | 25,576 (38)    | <.0001  |
| Anxiety disorder                                                    | 8,349 (18)  | 148,388 (21)   | <.0001  | 5,144 (18)                   | 16,403 (24)    | <.0001  |
| Alcohol dependency                                                  | 8,133 (18)  | 130,603 (19)   | <.0001  | 5,286 (19)                   | 15,822 (24)    | <.0001  |

| Characteristics                                                     | AKI No. (%) | no AKI No. (%) | p-value | AKI No. (%) | no AKI No. (%) | p-value |
|---------------------------------------------------------------------|-------------|----------------|---------|-------------|----------------|---------|
| Drug dependency                                                     | 2,751 (6)   | 29,210 (4)     | <.0001  | 1,914 (7)   | 6,786 (10)     | <.0001  |
| Any Mental Health Encounters                                        | 23,211 (51) | 354,843 (51)   | 0.5     | 14,450 (51) | 38,846 (58)    | <.0001  |
| Primary care visit(s) during 18 months before COVID-19 diagnosis    | 43,548 (95) | 595,482 (85)   | <.0001  | 26,961 (94) | 62,672 (93)    | <.0001  |
| <i>Symptoms on a day or up to 30 days before COVID-19 diagnosis</i> |             |                |         |             |                |         |
| Cough                                                               | 16,525 (36) | 194,503 (28)   | <.0001  | 11,779 (41) | 26,315 (39)    | <.0001  |
| Fatigue                                                             | 11,077 (24) | 88,660 (13)    | <.0001  | 8,439 (30)  | 16,582 (26)    | <.0001  |
| Chills                                                              | 3,880 (8)   | 57,273 (8)     | 0.05    | 2,509 (9)   | 6,082 (9)      | 0.1     |
| Myalgia                                                             | 3,183 (7)   | 58,986 (9)     | <.0001  | 1,918 (7)   | 5,066 (8)      | <.0001  |
| Headache                                                            | 5,275 (12)  | 102,183 (15)   | <.0001  | 3,287 (12)  | 9,524 (10)     | <.0001  |
| Loss of Smell or Taste                                              | 2,544 (6)   | 40,423 (6)     | 0.03    | 1,718 (6)   | 4,120 (6)      | 0.4     |
| Sore Throat                                                         | 3,101 (7)   | 72,115 (10)    | <.0001  | 1,792 (6)   | 4,814 (7)      | <.0001  |
| Abdominal pain                                                      | 3,007 (7)   | 22,862 (3)     | <.0001  | 2,357 (8)   | 5,658 (7)      | 0.3     |
| <i>COVID-19 complications within 60 days of COVID-19 diagnosis</i>  |             |                |         |             |                |         |
| Hospital Acquired VTE                                               | 408 (1)     | 296 (0.4)      | <.0001  | 408 (1.5)   | 296(0.5)       | <.0001  |
| Acute Respiratory Failure                                           | 20,375 (45) | 37,748 (5)     | <.0001  | 15,084 (53) | 23,836 (36)    | <.0001  |
| Respiratory Distress Syndrome (ARDS)                                | 3,649 (8)   | 2,425 (0.4)    | <.0001  | 2,485 (9)   | 1,461 (2)      | <.0001  |
| Acute Myocardial Infarction (MI)                                    | 4,287 (10)  | 4,901 (1)      | <.0001  | 3,214 (11)  | 3,081 (5)      | <.0001  |
| Arrhythmia                                                          | 1,830 (4)   | 5,469 (1)      | <.0001  | 1,647 (6)   | 2,747 (4)      | <.0001  |
| Peripheral Arterial Disease (PAD)                                   | 5,829/ (13) | 16,340 (2)     | <.0001  | 4,680 (17)  | 7,187 (11)     | <.0001  |
| VTE                                                                 | 3,894/ (9)  | 9,605 (1)      | <.0001  | 2,957 (11)  | 4,626 (7)      | <.0001  |
| Blood Transfusion                                                   | 4,174 (9)   | 3,485 (0.5)    | <.0001  | 4,104/ (15) | 3,316 (5)      | <.0001  |
| <i>Demographic characteristics</i>                                  |             |                |         |             |                |         |
| Urban                                                               | 31,972 (83) | 498,269 (84)   | <.0001  | 20,094 (85) | 44,130 (85)    | 0.03    |
| Small Town                                                          | 3,452 (9)   | 52,600 (9)     | <.0001  | 1,846 (8)   | 4,171 (8)      | 0.03    |
| Rural                                                               | 3,045 (8)   | 40,124 (7)     | <.0001  | 1,667 (7)   | 3,627 (7)      | 0.03    |
| North-Eastern Region                                                | 10,006 (22) | 156,605 (23)   | <.0001  | 6,060 (21)  | 13,989 (21)    | 0.03    |
| Mid-Western Region                                                  | 10,268 (23) | 159,601 (23)   | <.0001  | 6,537 (23)  | 15,942 (24)    | 0.03    |
| Southern Region                                                     | 12,850 (28) | 185,671 (28)   | <.0001  | 8,076 (28)  | 18,313 (28)    | 0.03    |
| South-Central Region                                                | 4,955 (10)  | 72,407 (11)    | <.0001  | 3,187 (11)  | 7,311 (11)     | 0.03    |

| Characteristics | AKI No. (%) | no AKI No. (%) | p-value | AKI No. (%) | no AKI No. (%) | p-value |
|-----------------|-------------|----------------|---------|-------------|----------------|---------|
| Western Region  | 7,364 (16)  | 116,786 (16)   | <.0001  | 4,549 (16)  | 10,867 (16)    | 0.03    |

Table S2. Baseline blood level values for laboratory parameters associated with kidney disease and inflammation among hospitalized COVID-19 patients at US Department of Veterans Affairs between January 2020 and December 2022 by AKI status; N=95,573

| Blood level                       | AKI patients<br>N=28,573 | Mean/Median<br>(SD) | non-AKI patients<br>N=67,000 | Mean/Median<br>(SD) | Normal ranges |
|-----------------------------------|--------------------------|---------------------|------------------------------|---------------------|---------------|
| Albumin (g/dL)                    | 24,876                   | 3.5 /3.5 (0.7)      | 59,197                       | 3.6/3.7 (0.6)       | 3.4-5.4       |
| BUN (mg/dL)                       | 25,273                   | 5.1/3.1 (7.8)       | 54,250                       | 2.9/1.7 (4.7)       | 6.0-24        |
| Creatinine (mg/dL)                | 26,698                   | 1.9/1.6 (1.8)       | 58,550                       | 1.1/1.0 (0.3)       | 0.6-1.35      |
| C-reactive protein (mg/L)         | 15,128                   | 91/68 (87)          | 29,231                       | 63/41 (62)          | under 10      |
| Ferritin (ng/mL)                  | 16,141                   | 221/117 (246)       | 29,822                       | 197/94 (231)        | 24-336        |
| eGFR (ml/min/1.73m <sup>2</sup> ) | 21,787                   | 32/24 (32)          | 41,532                       | 50/56 (41)          | over 60       |
| Hemoglobin (g/dL)                 | 25,982                   | 12.3 /12.5 (2.5)    | 57,189                       | 13.2 /13.4 (2.2)    | 13.8-17.2     |
| LDH (IU/L)                        | 12,918                   | 217/158 (305)       | 23,820                       | 160/111 (180)       | 105-333       |
| Lymphocytes (%)                   | 18,940                   | 15/13 (11)          | 39,859                       | 19/17 (12)          | 20-40         |
| Neutrophils (%)                   | 17,700                   | 73 /75 (12)         | 37,680                       | 67/70 (17)          | 40-60         |
| Platelets (X10 <sup>9</sup> /L)   | 26,078                   | 143/135 (128)       | 57,681                       | 143 /145 (128)      | 150-400       |
| WBC (X10 <sup>9</sup> /L)         | 26,557                   | 8.9/7.4 (9)         | 58,354                       | 7.7/6.8 (6.3)       | 4.5-11        |
